# Supplementary material
Source: publisher figshare collection journal article supplement (https://acs.figshare.com/ndownloader/files/3865615)
Supplement: Supplementary file 1 [file 3865615]

## Supporting Information

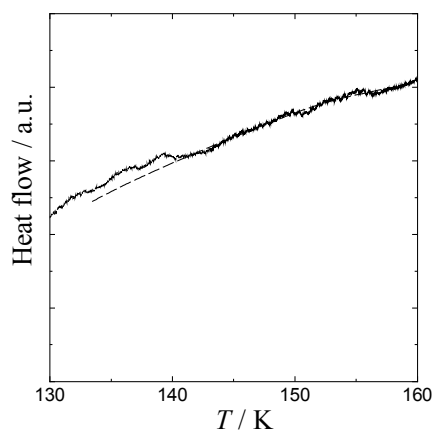

**Figure. S1** Heat-flow curve, scanned at a heating rate of +3 K/min, for the ACIBA crystal: A dashed line is a guide for eyes.
